# Supplementary material for: A Validated HPLC-UV-ESI-IT-MS Method for the Quantification of Carnosol in Lepechinia mutica, a Medicinal Plant Endemic to Ecuador
Source: MDPI journal article supplement (doi:10.3390/molecules28186701), 2023-09-19
Supplement: s1 [file s1]

## SUPPLEMENTARY INFORMATION

# A validated HPLC-UV-ESI-IT-MS method for the quantification of carnosol in *Lepechinia mutica*, a medicinal plant endemic to Ecuador

Natalí Solano-Cueva <sup>1</sup>, Jorge G. Figueroa <sup>1</sup>, Corina Loja <sup>1</sup>, Chabaco Armijos <sup>1</sup>, Giovanni Vidari <sup>2</sup> and Jorge Ramírez <sup>1,\*</sup>

<sup>1</sup> Departamento de Química, Universidad Técnica Particular de Loja, 1101608 Loja, Ecuador; nesolano@utpl.edu.ec (N.S.-C.); jgfigueroa@utpl.edu.ec (J.G.F.); cbloja@utpl.edu.ec (C.L.); cparmijos@utpl.edu.ec (C.A.)

<sup>2</sup> Medical Analysis Department, Faculty of Science, Tishk International University, Erbil 44001, Iraq; vidari@unipv.it

\* Correspondence: jramirez@utpl.edu.ec

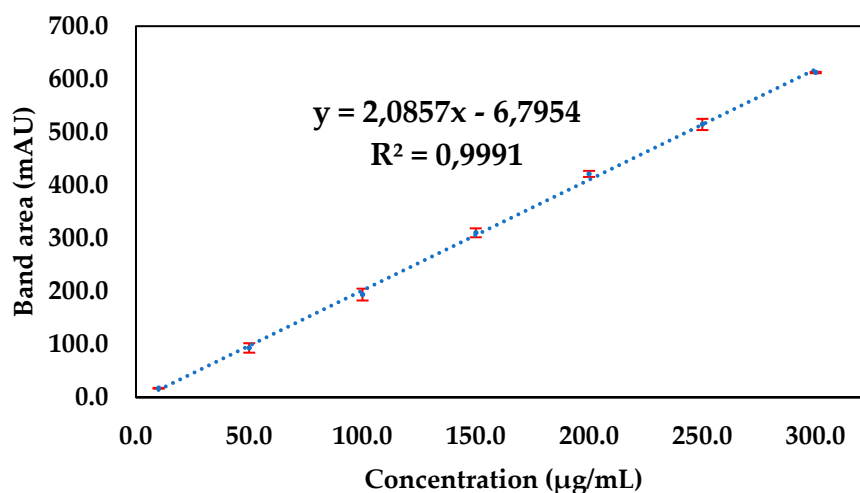

**Figure S1.** Calibration curve of standard carnosol (1). Error bars show the standard deviation of the mean.

**Table S1.** Analytical data, obtained by analyst 1, that were used to measure the repeatability of the analytical method.

| Weight of residue<br>A' (mg) | Carnosol concentration (mg/g dry<br>leaves) |       |       | RSD<br>(%) |
|------------------------------|---------------------------------------------|-------|-------|------------|
|                              | Day 1                                       | Day 2 | Day 3 |            |
| 5                            | 0.84                                        | 0.79  | 0.78  | 3.6        |
| 10                           | 0.80                                        | 0.84  | 0.79  | 3.3        |
| 15                           | 0.83                                        | 0.80  | 0.79  | 2.8        |

RSD: Relative standard deviation.

**Table S2.** Analytical data, obtained by analyst 2, that were used to measure the intermediate precision of the analytical method.

| Weight of residue<br>A' (mg) | Carnosol concentration (mg/g dry<br>leaves) |       |       | RSD<br>(%) |
|------------------------------|---------------------------------------------|-------|-------|------------|
|                              | Day 1                                       | Day 2 | Day 3 |            |
| 5                            | 0.83                                        | 0.78  | 0.83  | 3.6        |
| 10                           | 0.81                                        | 0.83  | 0.78  | 3.2        |
| 15                           | 0.79                                        | 0.81  | 0.82  | 1.9        |

RSD: Relative standard deviation.
